# Supplementary material
Source: PubMed Central journal article supplement (PMC6741600)
Supplement: jin-0006-0072-s03.pdf [file jin-0006-0072-s03.pdf]

Serafino *et al.* “Thymosin  $\alpha$ 1 activates complement receptor-mediated phagocytosis in human monocyte-derived macrophages”

SUPPLEMENTARY Materials and Methods and SUPPLEMENTARY Table

**Supplementary Table 1** Primer sequences for *Quantitative Reverse Transcription Polymerase Chain Reaction (QPCR)*.

| <b>Cytokines</b>                 |                  |                               |
|----------------------------------|------------------|-------------------------------|
| <b>Gene</b>                      | <b>Direction</b> | <b>Primer</b>                 |
| <i>TNF<math>\alpha</math></i>    | forward          | 5'-CTTCTGCCTGCTGCACTTT-3'     |
|                                  | reverse          | 5'-GGTTCAGCCACTGGAGCTG-3'     |
| <i>IL-6</i>                      | forward          | 5'-GTACATCCTCGACGGCATCT-3'    |
|                                  | reverse          | 5'-GCCTCTTTGCTGCTTTCACA-3'    |
| <b>Toll-like Receptors (TLR)</b> |                  |                               |
| <b>Gene</b>                      | <b>Direction</b> | <b>Primer</b>                 |
| <i>TLR-2</i>                     | forward          | 5'-CTCTCAGGTGACTGCTCGGA-3'    |
|                                  | reverse          | 5'-CCAGTGCTTCAACCCACAAC-3'    |
| <i>TLR-4</i>                     | forward          | 5'-GGTCACCTTTTCTTGATTCCA-3'   |
|                                  | reverse          | 5'-TCAGAGGTCCATCAAACATCA-3'   |
| <i>TLR-5</i>                     | forward          | 5'-GCTTAATCACACCAATGTCAC-3'   |
|                                  | reverse          | 5'-GAAACCCAGAGAACGAGT-3'      |
| <i>TLR-6</i>                     | forward          | 5'-GCTTAATCACACCAATGTCAC-3'   |
|                                  | reverse          | 5'-GAAACCCAGAGAACGAGT-3'      |
| <i>TLR-7</i>                     | forward          | 5'-GCTATCAGATTCAAAAACAACAG-3' |
|                                  | reverse          | 5'-AAACACCTTTGTAGATCACTTCT-3' |
| <i>TLR-8</i>                     | forward          | 5'-TTTCTTTCTGAAGTCAGTAGTCT-3' |
|                                  | reverse          | 5'-TTTCCGTGTAGTTCCAACATAGA-3' |
| <i>TLR-9</i>                     | forward          | 5'-TGAGTGAGAACTTCCTCTACA-3'   |
|                                  | reverse          | 5'-TTTTGGTAATTGAAGGACAGGT-3'  |
